# Supplementary material
Source: PubMed Central journal article supplement (PMC8529527)
Supplement: jamasurg-e215104-s002.pdf [file jamasurg-e215104-s002.pdf]

## Supplementary Online Content

Huang C, Liu H, Hu Y, et al; Chinese Laparoscopic Gastrointestinal Surgery Study (CLASS) Group. Laparoscopic vs open distal gastrectomy for locally advanced gastric cancer: five-year outcomes from the CLASS-01 randomized clinical trial. *JAMA Surg*. Published online October 20, 2021. doi:10.1001/jamasurg.2021.5104

**eFigure 1.** Sensitivity Analysis of ITT Population

**eFigure 2.** Per-Protocol and As-Treated Analyses

**eTable.** Cause of Death

This supplementary material has been provided by the authors to give readers additional information about their work.

**eFigure 1.** Sensitivity Analysis of ITT Population

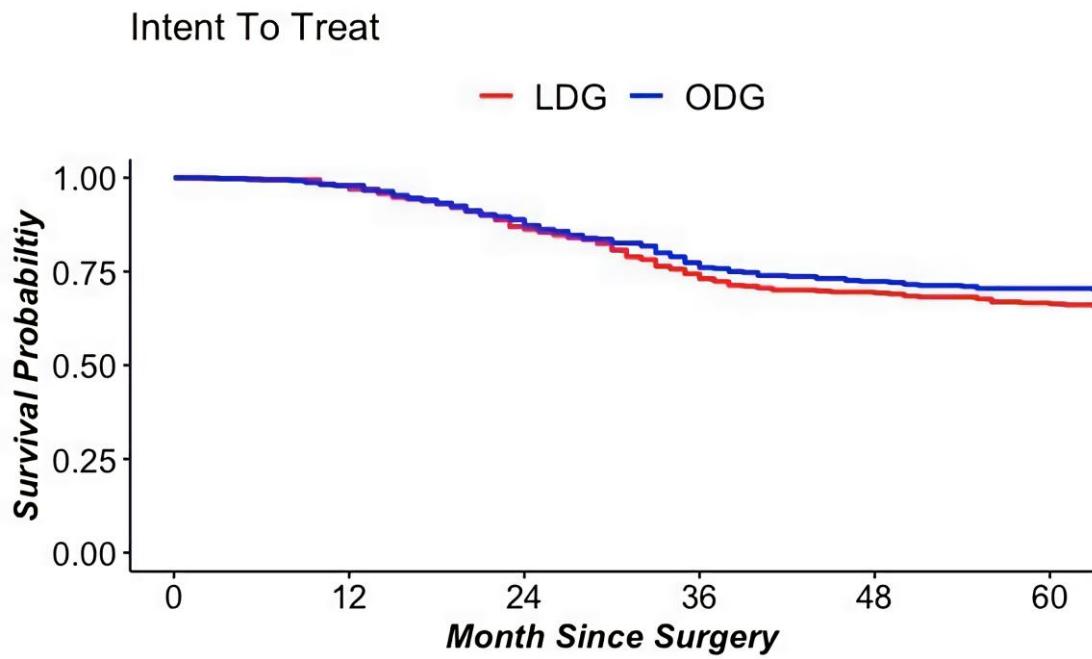

No.at risk

|     |     |     |     |     |     |     |
|-----|-----|-----|-----|-----|-----|-----|
| LDG | 401 | 392 | 347 | 294 | 265 | 253 |
| ODG | 387 | 378 | 342 | 296 | 272 | 261 |

## eFigure 2. Per-Protocol and As-Treated Analyses

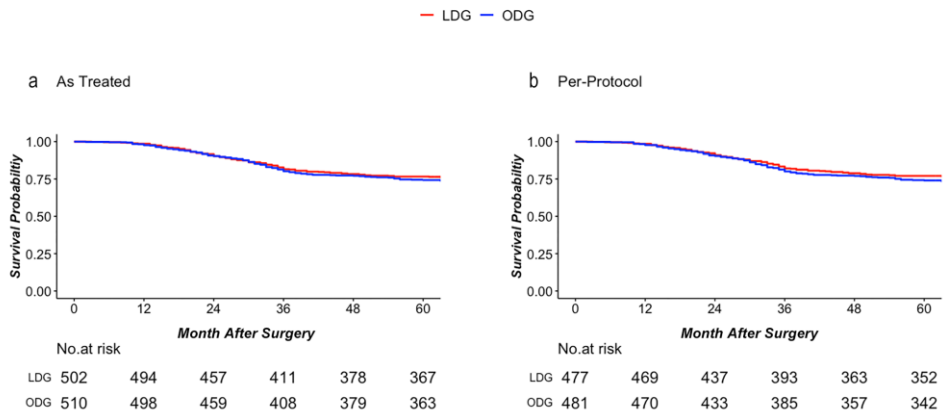

**eTable. Cause of Death**

|       | Gastric Tumor Related | Other Tumor Related | Non-Tumor Related | Unknown   | Accident | Missing Death Cause | Total |
|-------|-----------------------|---------------------|-------------------|-----------|----------|---------------------|-------|
| LDG   | 112 (39.2%)           | 8 (2.8%)            | 8 (2.8%)          | 16 (5.6%) | 1 (0.4%) | 7 (2.4%)            | 152   |
| ODG   | 101 (35.3%)           | 4 (1.4%)            | 7 (2.4%)          | 16 (5.6%) | 0 (0%)   | 6 (2.1%)            | 134   |
| Total | 213                   | 12                  | 15                | 32        | 1        | 13                  | 286   |
