# Supplementary material
Source: PubMed Central journal article supplement (PMC8529527)
Supplement: jamasurg-e215104-s003.pdf [file jamasurg-e215104-s003.pdf]

\*Indicates required information. Only first name, last name, and suffix will appear in PubMed.

| <b>*Group Name(s): Chinese Laparoscopic Gastrointestinal Surgery Study (CLASS) Group</b> |                   |                              |                  |                                                                                                                                                                     |                                          |                                                         |                                                                                            |
|------------------------------------------------------------------------------------------|-------------------|------------------------------|------------------|---------------------------------------------------------------------------------------------------------------------------------------------------------------------|------------------------------------------|---------------------------------------------------------|--------------------------------------------------------------------------------------------|
| <b>*First Name and Middle Initial(s)</b>                                                 | <b>*Last Name</b> | <b>*Suffix (eg, Jr, III)</b> | Academic Degrees | Institution                                                                                                                                                         | Location (city, state/province, country) | Role or Contribution, eg, chair, principal investigator | Group (if more than 1 Group listed in the byline) and/or Subgroup (eg, Steering Committee) |
| Jiang                                                                                    | Yu                |                              | MD               | Department of General Surgery, Nanfang Hospital, Southern Medical University                                                                                        | Guangzhou,China                          | co-PI                                                   |                                                                                            |
| Changming                                                                                | Huang             |                              | MD               | Department of Gastric Surgery, Fujian Medical University Union Hospital                                                                                             | Fuzhou,China                             | PI                                                      |                                                                                            |
| Yihong                                                                                   | Sun               |                              | MD               | Department of General Surgery,Zhongshan Hospital, Fudan University                                                                                                  | Shanghai, China                          | PI                                                      |                                                                                            |
| Xiangqian                                                                                | Su                |                              | MD               | Key laboratory of Carcinogenesis and Translational Research, Ministry of Education, Gastrointestinal Cancer Center, Peking University Cancer Hospital and Institute | Beijing, China                           | PI                                                      |                                                                                            |
| Hui                                                                                      | Cao               |                              | MD               | Department of Gastrointestinal Surgery, Renji Hospital, Shanghai Jiao Tong University School of Medicine                                                            | Shanghai, China                          | PI                                                      |                                                                                            |
| Jiankun                                                                                  | Hu                |                              | MD               | Department of Gastrointestinal Surgery & Laboratory of Gastric Cancer, State Key Laboratory of Biotherapy,West China Hospital, Sichuan University                   | Chengdu, China                           | PI                                                      |                                                                                            |
| Kuan                                                                                     | Wang              |                              | MD               | Department of Gastrointestinal Surgery, the Cancer Hospital of Harbin Medical University                                                                            | Harbin, China                            | PI                                                      |                                                                                            |
| Jian                                                                                     | Suo               |                              | MD               | Department of Gastrointestinal Surgery, the First Hospital, Jilin University                                                                                        | Changchun, China                         | PI                                                      |                                                                                            |

## Supplemental Online Content: Nonauthor Collaborators

\*Indicates required information. Only first name, last name, and suffix will appear in PubMed.

| *First Name and Middle Initial(s) | *Last Name | *Suffix (eg, Jr, III) | Academic Degrees | Institution                                                                                                                   | Location (city, state/province, country) | Role or Contribution, eg, chair, principal investigator | Group (if more than 1 Group listed in the byline) and/or Subgroup (eg, Steering Committee) |
|-----------------------------------|------------|-----------------------|------------------|-------------------------------------------------------------------------------------------------------------------------------|------------------------------------------|---------------------------------------------------------|--------------------------------------------------------------------------------------------|
| Kaixiong                          | Tao        |                       | MD               | Department of Gastrointestinal Surgery, Union Hospital, Tongji Medical College, Huazhong University of Science and Technology | Wuhan, China                             | PI                                                      |                                                                                            |
| Xianli                            | He         |                       | MD               | Department of General Surgery, Tangdu Hospital, Fourth Military Medical University                                            | Xi'an, China                             | PI                                                      |                                                                                            |
| Hongbo                            | Wei        |                       | MD               | Department of Gastrointestinal Surgery, the Third Affiliated Hospital of Sun Yat-Sen University                               | Guangzhou, China                         | PI                                                      |                                                                                            |
| Mingang                           | Ying       |                       | MD               | Department of Gastrointestinal Oncological Surgery, Fujian Provincial Cancer Hospital                                         | Fuzhou, China                            | PI                                                      |                                                                                            |
| Weiguo                            | Hu         |                       | MD               | Department of Surgery, Ruijin Hospital, Shanghai Jiao Tong University School of Medicine                                      | Shanghai, China                          | PI                                                      |                                                                                            |
| Xiaohui                           | Du         |                       | MD               | Department of General Surgery, General Hospital of PLA                                                                        | Beijing, China                           | PI                                                      |                                                                                            |
| Yanfeng                           | Hu         |                       | MD               | Department of General Surgery, Nanfang Hospital, Southern Medical University                                                  | Guangzhou, China                         | Secretary                                               |                                                                                            |
| Hao                               | Liu        |                       | MD               | Department of General Surgery, Nanfang Hospital, Southern Medical University                                                  | Guangzhou, China                         | Secretary                                               |                                                                                            |
| Chaohui                           | Zheng      |                       | MD               | Department of Gastric Surgery, Fujian Medical University Union Hospital                                                       | Fuzhou, China                            | co-PI                                                   |                                                                                            |
| Ping                              | Li         |                       | MD               | Department of Gastric Surgery, Fujian Medical University Union Hospital                                                       | Fuzhou, China                            | co-PI                                                   |                                                                                            |

## Supplemental Online Content: Nonauthor Collaborators

\*Indicates required information. Only first name, last name, and suffix will appear in PubMed.

| *First Name and Middle Initial(s) | *Last Name | *Suffix (eg, Jr, III) | Academic Degrees | Institution                                                                                                                                                         | Location (city, state/province, country) | Role or Contribution, eg, chair, principal investigator | Group (if more than 1 Group listed in the byline) and/or Subgroup (eg, Steering Committee) |
|-----------------------------------|------------|-----------------------|------------------|---------------------------------------------------------------------------------------------------------------------------------------------------------------------|------------------------------------------|---------------------------------------------------------|--------------------------------------------------------------------------------------------|
| Jianwei                           | Xie        |                       | MD               | Department of Gastric Surgery, Fujian Medical University Union Hospital                                                                                             | Fuzhou, China                            | co-PI                                                   |                                                                                            |
| Fenglin                           | Liu        |                       | MD               | Department of General Surgery, Zhongshan Hospital, Fudan University                                                                                                 | Shanghai, China                          | co-PI                                                   |                                                                                            |
| Ziyu                              | Li         |                       | MD               | Key laboratory of Carcinogenesis and Translational Research, Ministry of Education, Gastrointestinal Cancer Center, Peking University Cancer Hospital and Institute | Beijing, China                           | PI                                                      |                                                                                            |
| Gang                              | Zhao       |                       | MD               | Department of Gastrointestinal Surgery, Renji Hospital, Shanghai Jiao Tong University School of Medicine                                                            | Shanghai, China                          | co-PI                                                   |                                                                                            |
| Kun                               | Yang       |                       | MD               | Department of Gastrointestinal Surgery & Laboratory of Gastric Cancer, State Key Laboratory of Biotherapy, West China Hospital, Sichuan University                  | Chengdu, China                           | co-PI                                                   |                                                                                            |
| Chunxiao                          | Liu        |                       | MD               | Department of Gastrointestinal Surgery, the Cancer Hospital of Harbin Medical University                                                                            | Harbin, China                            | co-PI                                                   |                                                                                            |
| Haojie                            | Li         |                       | MD               | Department of General Surgery, Zhongshan Hospital, Fudan University                                                                                                 | Shanghai, China                          | co-PI                                                   |                                                                                            |
| Pingyan                           | Chen       |                       | PhD              | Department of Biostatistics, School of Public Health, Southern Medical University                                                                                   | Guangzhou, China                         | Consultant                                              |                                                                                            |

Supplemental Online Content: Nonauthor Collaborators

\*Indicates required information. Only first name, last name, and suffix will appear in PubMed.

| *First Name and Middle Initial(s) | *Last Name | *Suffix (eg, Jr, III) | Academic Degrees | Institution                                                                                                                                                         | Location (city, state/province, country) | Role or Contribution, eg, chair, principal investigator | Group (if more than 1 Group listed in the byline) and/or Subgroup (eg, Steering Committee) |
|-----------------------------------|------------|-----------------------|------------------|---------------------------------------------------------------------------------------------------------------------------------------------------------------------|------------------------------------------|---------------------------------------------------------|--------------------------------------------------------------------------------------------|
| Jiafu                             | Ji         |                       | MD               | Key laboratory of Carcinogenesis and Translational Research, Ministry of Education, Gastrointestinal Cancer Center, Peking University Cancer Hospital and Institute | Beijing, China                           | PI                                                      |                                                                                            |
| Guoxin                            | Li         |                       | MD,PhD           | Department of General Surgery, Nanfang Hospital, Southern Medical University                                                                                        | Guangzhou, China                         | Chair                                                   |                                                                                            |
