# Supplementary material
Source: PubMed Central journal article supplement (PMC8529527)
Supplement: jamasurg-e215104-s004.pdf [file jamasurg-e215104-s004.pdf]

## **Data Sharing Statement**

Huang. Laparoscopic vs Open Distal Gastrectomy for Locally Advanced Gastric Cancer. *JAMA Surg*. Published October 13, 2021. doi:10.1001/jamasurg.2021.5104

### **Data**

**Data available:** No
